# Supplementary material for: Development of a series of biobased poly(ethylene 2,5-furandicarboxylate-co-(5,5′-((phenethylazanediyl)bis(methylene))bis(furan-5,2-diyl))dimethylene 2,5-furandicarboxylate) copolymers via a sustainable and mild route: promising “breathing” food packaging materials
Source: Royal Society of Chemistry journal article supplement (doi:10.1039/d2gc01214f), 2022-01-01
Supplement: d2gc01214f1.pdf [file d2gc01214f1.pdf]

## SUPPORTING INFORMATION

Development of a Series of Biobased Poly(ethylene 2,5-  
furandicarboxylate-co-(5,5'-  
((phenethylazanediyl)bis(methylene))bis(furan-5,2-diyl))dimethylene 2,5-  
furandicarboxylate) Copolymers via a Sustainable and Mild Route:  
Promising “Breathing” Food Packaging Materials

Jing Yi<sup>a,b</sup>, Yuxuan Li<sup>b</sup>, Yuhao Zhao<sup>b</sup>, Zhanwei Xu<sup>c</sup>, Yuanpeng Wu<sup>a,\*</sup>, Min Jiang<sup>b,\*</sup>,  
Guangyuan Zhou<sup>b,\*</sup>

<sup>a</sup> School of New Energy and Materials, State Key Laboratory of Oil and Gas Reservoir  
Geology and Exploitation, Southwest Petroleum University, Chengdu, 610500, China.

<sup>b</sup> Division of Energy Materials (DNL 22), Dalian Institute of Chemical Physics, Chinese  
Academy of Sciences, Dalian, 116023, China.

<sup>c</sup> Dalian National Lab for Clean Energy, State Key Laboratory of Catalysis, Dalian  
Institute of Chemical Physics, Chinese Academy of Sciences, Dalian, 116023, China.

\* Corresponding author:

E-mail address: [jiangmin@dicp.ac.cn](mailto:jiangmin@dicp.ac.cn) (Min Jiang)

E-mail address: [ypwu@swpu.edu.cn](mailto:ypwu@swpu.edu.cn) (Yuanpeng Wu)

E-mail address: [gyzhou@dicp.ac.cn](mailto:gyzhou@dicp.ac.cn) (Guangyuan Zhou)

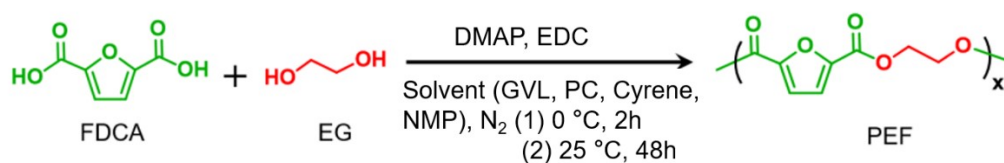

**Scheme S1.** Synthesis route of PEF with different solvents.

**Table S1.** Characters of conventional dipolar aprotic solvent (NMP) and green solvents (GVL, PC and Cyrene).

| Solvents | M <sub>w</sub><br>(g/mol) | Boiling<br>point (°C) | Density<br>(g/mL) | Dipolarity | LD50, Oral-rat<br>(mg/kg) |
|----------|---------------------------|-----------------------|-------------------|------------|---------------------------|
| GVL      | 100.11                    | 207                   | 1.04              | 0.83       | 8800                      |
| PC       | 102.09                    | 242                   | 1.21              | 0.83       | 34900                     |
| Cyrene   | 128.13                    | 227                   | 1.25              | 0.93       | > 2000                    |
| NMP      | 99.13                     | 202                   | 1.028             | 0.92       | 3914                      |

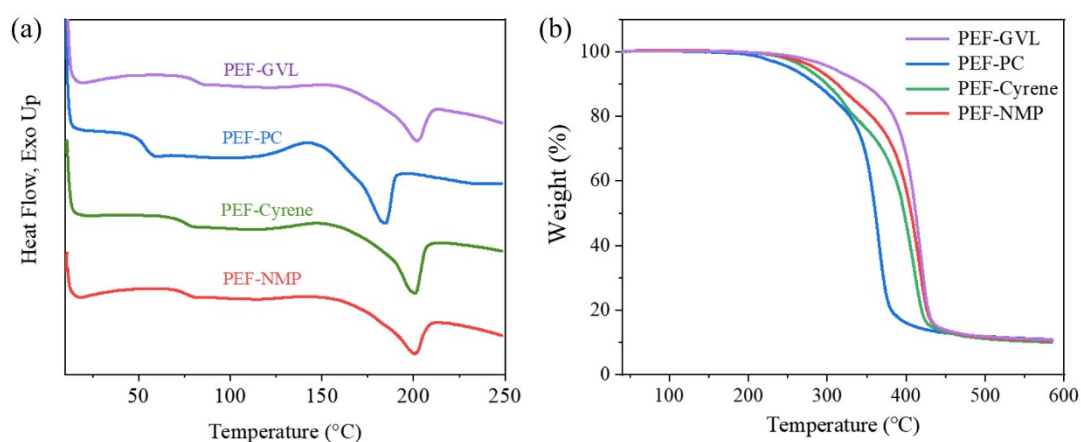

**Figure S1.** (a) Second heating DSC curves and (b) TGA curves of PEF with different solvents.

**Table S2.** Thermal properties of PEF prepared by different solvents.

| Sample       | DSC        | TGA           |             |
|--------------|------------|---------------|-------------|
|              | $T_g$ (°C) | $T_{d5}$ (°C) | residue (%) |
| PEF - GVL    | 82         | 306           | 10.8        |
| PEF - PC     | 53         | 253           | 10.9        |
| PEF - Cyrene | 74         | 272           | 10.1        |
| PEF - NMP    | 77         | 284           | 10.5        |

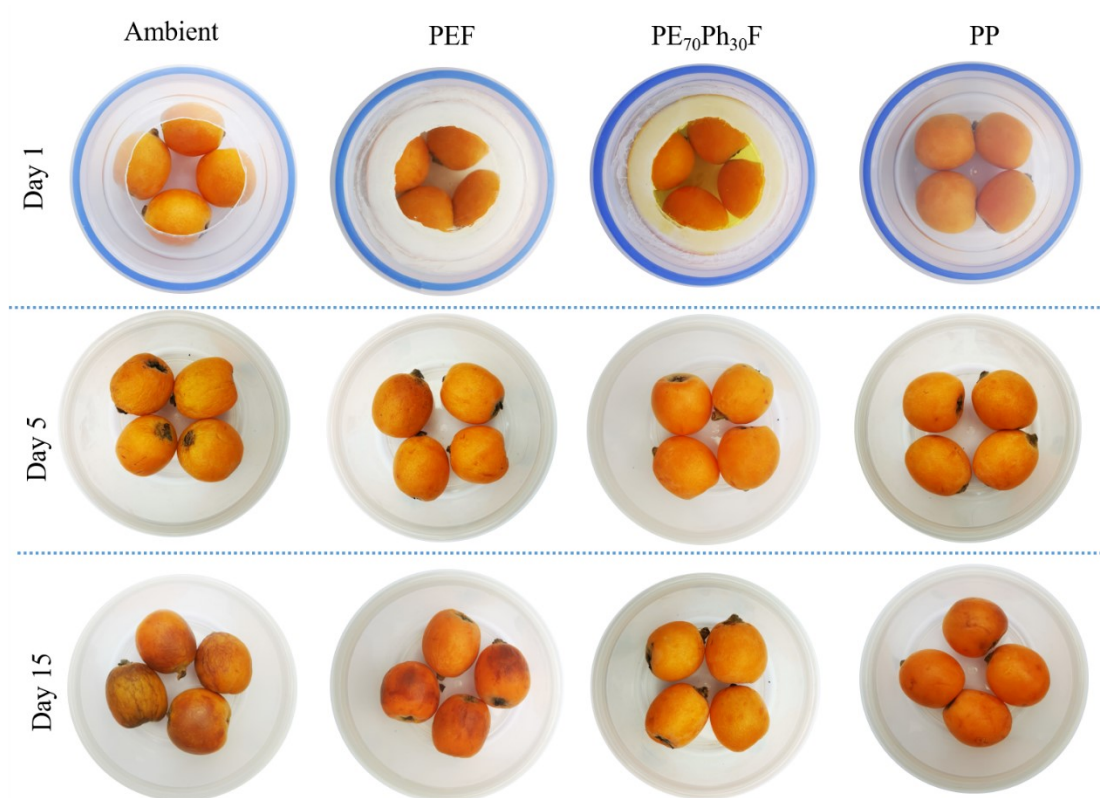

**Figure S2.** Photographs of ambient (unpackaged) and packaged loquats stored at room temperature after 1 day, 5 days and 15 days.

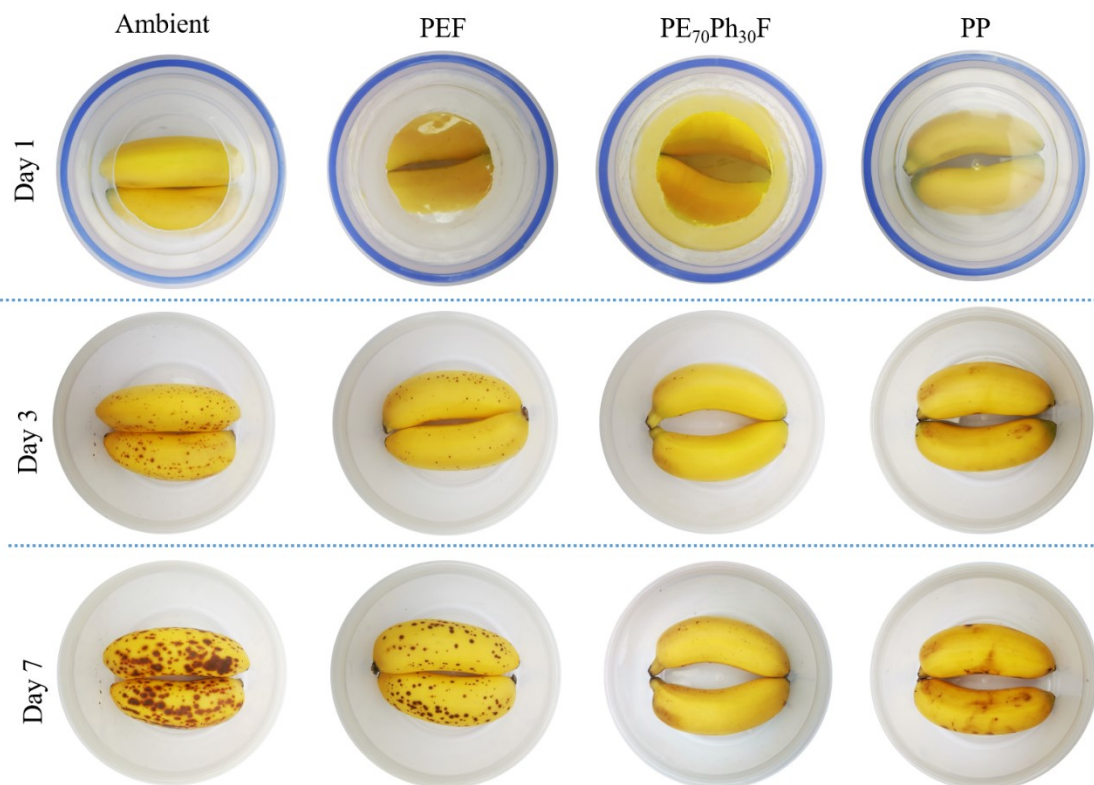

**Figure S3.** Photographs of ambient (unpackaged) and packaged bananas stored at room temperature after 1 day, 3 days and 7 days.
